# Supplementary material for: An engineered organic electrochemical transistor (OECT) platform with a highly ammonia-sensitive mesoporous membrane
Source: Royal Society of Chemistry journal article supplement (doi:10.1039/d2sd00099g), 2022-01-01
Supplement: d2sd00099g1.pdf [file d2sd00099g1.pdf]

## Electronic Supplementary Information

**An engineered organic electrochemical transistor (OECT) platform with a high ammonia-sensitive mesoporous membrane**

Indrani Medhi,<sup>a</sup> Parameswar Krishnan Iyer<sup>\*a,b</sup>

Centre for Nanotechnology, Indian Institute of Technology, Guwahati 781039, Assam (India).

Department of Chemistry, Indian Institute of Technology, Guwahati 781039, Assam(India).\*

E-mail: [pki@iitg.ac.in](mailto:pki@iitg.ac.in)

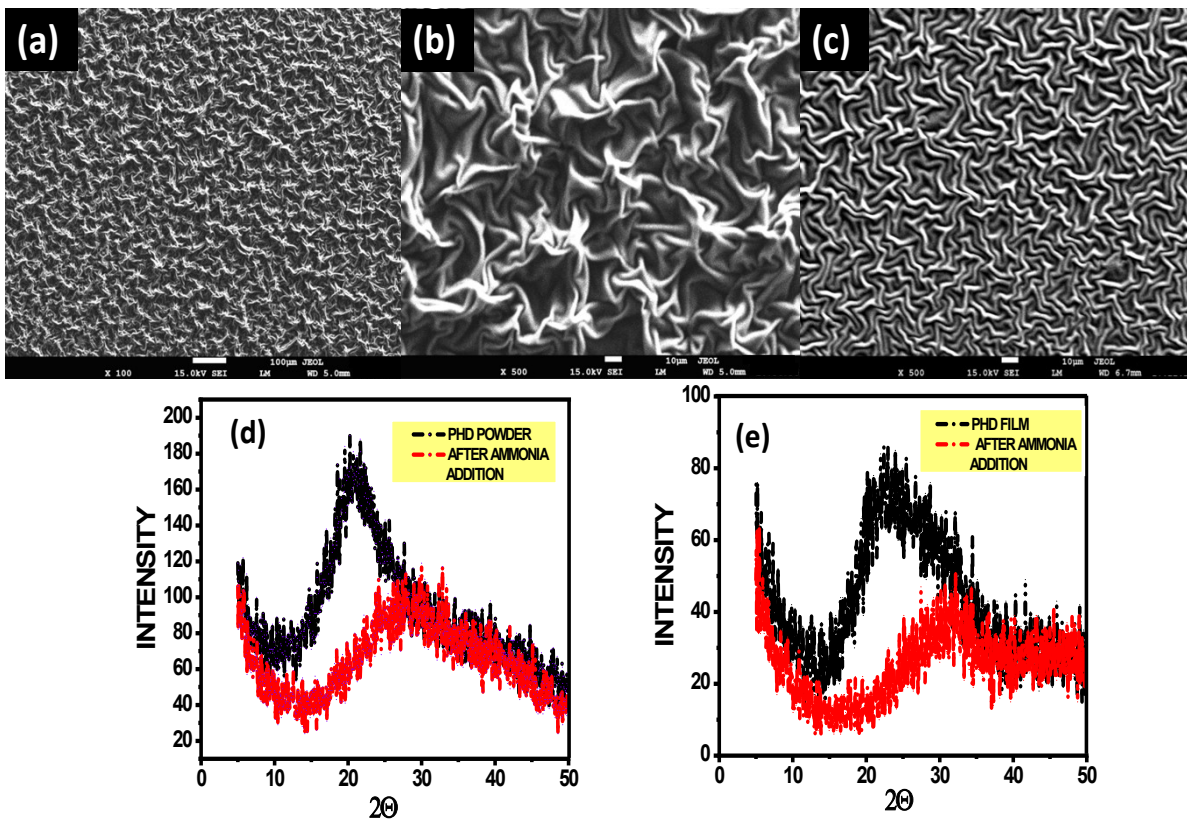

**Figure S1.** Analytical Imaging and Qualitative Evaluation of Polyhydroxyl Derivative. a) FESEM image of PHD at 100X. b) FESEM image of PHD at 500X before exposure to ammonia. c) FESEM image of PHD at 500X after exposure to ammonia. d) XRD images of PHD in powder form before and after exposure to ammonia. e) XRD images of PHD in film form before and after exposure to ammonia.
